# Supplementary material for: Cultures of humanities publishing: Introducing the PACE-index to understand diversity and conformity in scholarly communication
Source: Research Square preprint supplement (doi:10.21203/rs.3.rs-7507698/v1), 2025-09-09
Supplement: Supplementary file 1 [file 81457cbef8abeeafb6bab0ad.docx]

**APPENDIX**

Table A1. Number of publications in the recent period of 2019-2023 within different humanities subjects, and the share of Peer-reviewed, Article, Co-authored, English and PACE publication

| Subject | No.publications (2019–2023) | Peer-reviewed | Article | Co-authored | English | PACE |
| --- | --- | --- | --- | --- | --- | --- |
| History | 5287 | 46% | 27% | 27% | 51% | 6% |
| Comparative Language Studies and Linguistics | 2969 | 74% | 39% | 62% | 82% | 23% |
| Studies of Specific Languages | 2831 | 66% | 34% | 41% | 56% | 10% |
| Philosophy | 2458 | 66% | 45% | 31% | 81% | 14% |
| General Literary studies | 2452 | 54% | 28% | 20% | 45% | 3% |
| Religious Studies | 2088 | 47% | 24% | 20% | 56% | 5% |
| Archaeology | 1738 | 57% | 39% | 53% | 69% | 23% |
| Cultural Studies | 1416 | 58% | 30% | 35% | 70% | 9% |
| History of Science and Ideas | 1364 | 48% | 25% | 21% | 48% | 5% |
| Studies of Specific Literatures | 1282 | 61% | 29% | 19% | 58% | 2% |
| Design | 1194 | 62% | 25% | 63% | 92% | 17% |
| Other Humanities not elsewhere specified | 1075 | 55% | 28% | 41% | 71% | 12% |
| Ethnology | 1031 | 53% | 32% | 35% | 51% | 11% |

Table A2. Number and share of publications in different languages in four selected humanities subject (2004-2023)

| Language | History of Science and Ideas | | Comparative Language Studies and Linguistics | | | General Literary studies | | Philosophy | | |
| --- | --- | --- | --- | --- | --- | --- | --- | --- | --- | --- |
| English | 1797 | 42.64% | 7081 | 79.62% | 3404 | | 36.23% | 6933 | 77.39% |
| Swedish | 2187 | 51.90% | 1254 | 14.10% | 4741 | | 50.46% | 1748 | 19.51% |
| German | 69 | 1.64% | 172 | 1.93% | 471 | | 5.01% | 61 | 0.68% |
| French | 56 | 1.33% | 110 | 1.24% | 354 | | 3.77% | 61 | 0.68% |
| Spanish | 24 | 0.57% | 64 | 0.72% | 111 | | 1.18% | 22 | 0.25% |
| Danish | 9 | 0.21% | 6 | 0.07% | 81 | | 0.86% | 16 | 0.18% |
| Italian | 10 | 0.24% | 32 | 0.36% | 31 | | 0.33% | 27 | 0.30% |
| Finnish | 7 | 0.17% | 34 | 0.38% | 27 | | 0.29% | 11 | 0.12% |
| Portuguese | 4 | 0.09% | 26 | 0.29% | 20 | | 0.21% | 23 | 0.26% |
| Norwegian | 13 | 0.31% | 7 | 0.08% | 36 | | 0.38% | 15 | 0.17% |
| Polish | 9 | 0.21% | 1 | 0.01% | 43 | | 0.46% | 10 | 0.11% |
| Russian | 6 | 0.14% | 23 | 0.26% | 25 | | 0.27% | 9 | 0.10% |
| Chinese | 10 | 0.24% | 6 | 0.07% | 1 | | 0.01% | 6 | 0.07% |
| Dutch | 2 | 0.05% | 7 | 0.08% | 7 | | 0.07% | 3 | 0.03% |
| Serbian | 0 | 0.00% | 9 | 0.10% | 9 | | 0.10% | 0 | 0.00% |
| Japanese | 0 | 0.00% | 10 | 0.11% | 3 | | 0.03% | 2 | 0.02% |
| Romanian | 0 | 0.00% | 2 | 0.02% | 4 | | 0.04% | 8 | 0.09% |
| Turkish | 2 | 0.05% | 8 | 0.09% | 1 | | 0.01% | 1 | 0.01% |
| Esperanto | 0 | 0.00% | 11 | 0.12% | 0 | | 0.00% | 0 | 0.00% |
| Estonian | 3 | 0.07% | 7 | 0.08% | 0 | | 0.00% | 0 | 0.00% |
| Icelandic | 2 | 0.05% | 6 | 0.07% | 2 | | 0.02% | 0 | 0.00% |
| Greek | 0 | 0.00% | 2 | 0.02% | 5 | | 0.05% | 1 | 0.01% |
| Bulgarian | 1 | 0.02% | 2 | 0.02% | 3 | | 0.03% | 0 | 0.00% |
| Arabic | 0 | 0.00% | 1 | 0.01% | 4 | | 0.04% | 1 | 0.01% |
| Czech | 0 | 0.00% | 0 | 0.00% | 4 | | 0.04% | 1 | 0.01% |
| Latvian | 2 | 0.05% | 1 | 0.01% | 1 | | 0.01% | 0 | 0.00% |
| Hungarian | 0 | 0.00% | 2 | 0.02% | 2 | | 0.02% | 0 | 0.00% |
| Catalan | 0 | 0.00% | 3 | 0.03% | 0 | | 0.00% | 0 | 0.00% |
| Ukrainian | 1 | 0.02% | 1 | 0.01% | 0 | | 0.00% | 0 | 0.00% |
| Croatian | 0 | 0.00% | 2 | 0.02% | 0 | | 0.00% | 0 | 0.00% |
| Irish | 0 | 0.00% | 0 | 0.00% | 2 | | 0.02% | 0 | 0.00% |
| Lithuanian | 0 | 0.00% | 0 | 0.00% | 2 | | 0.02% | 0 | 0.00% |
| Slovenian | 0 | 0.00% | 1 | 0.01% | 1 | | 0.01% | 0 | 0.00% |
| Korean | 0 | 0.00% | 1 | 0.01% | 0 | | 0.00% | 0 | 0.00% |
| Mongolian | 0 | 0.00% | 1 | 0.01% | 0 | | 0.00% | 0 | 0.00% |
| Persian | 0 | 0.00% | 0 | 0.00% | 1 | | 0.01% | 0 | 0.00% |

Figure A1–A4. Distribution of publication types in four selected humanities subjects
